# Supplementary material
Source: publisher site journal article supplement (https://www.dovepress.com/article/496982)
Supplement: Supplementary file 1 [file get_supplementary_file.php]

# Supporting Information

**
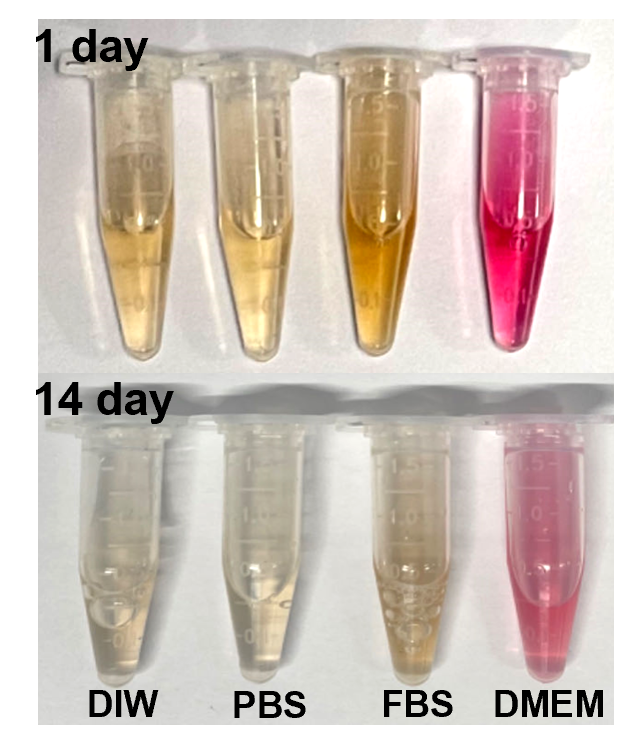
**

**Figure 1S** RBC@ICG-DOX NPs dissolved in different solvents for 14 days stability.

**
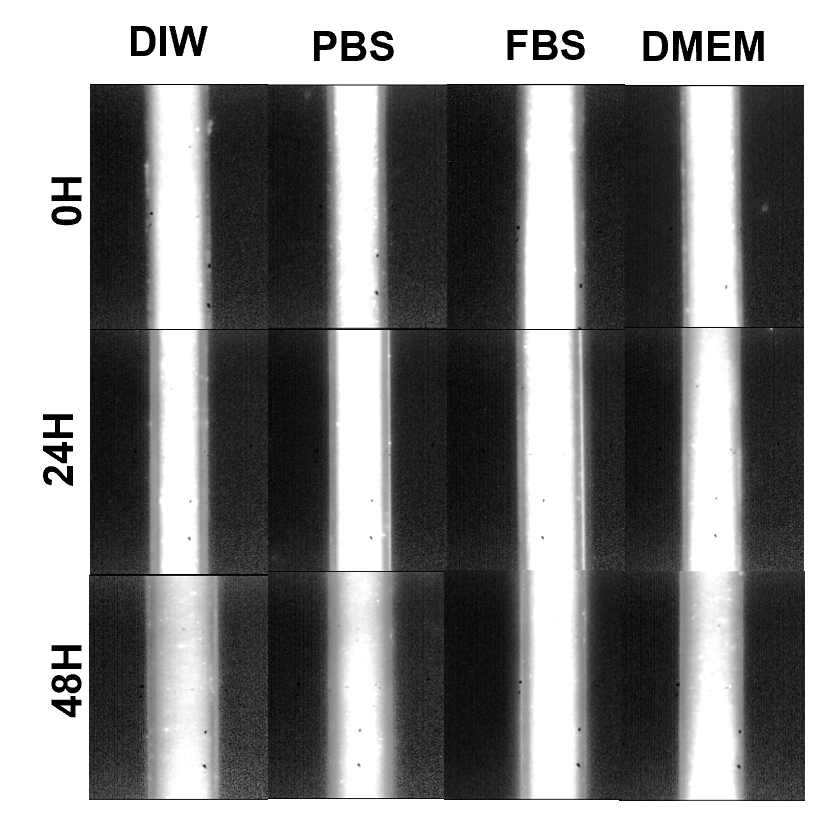
**

**Figure 2S** Fluorescence stability of RBC@ICG-DOX NPs in different solvents at 0, 24 and 48 h.


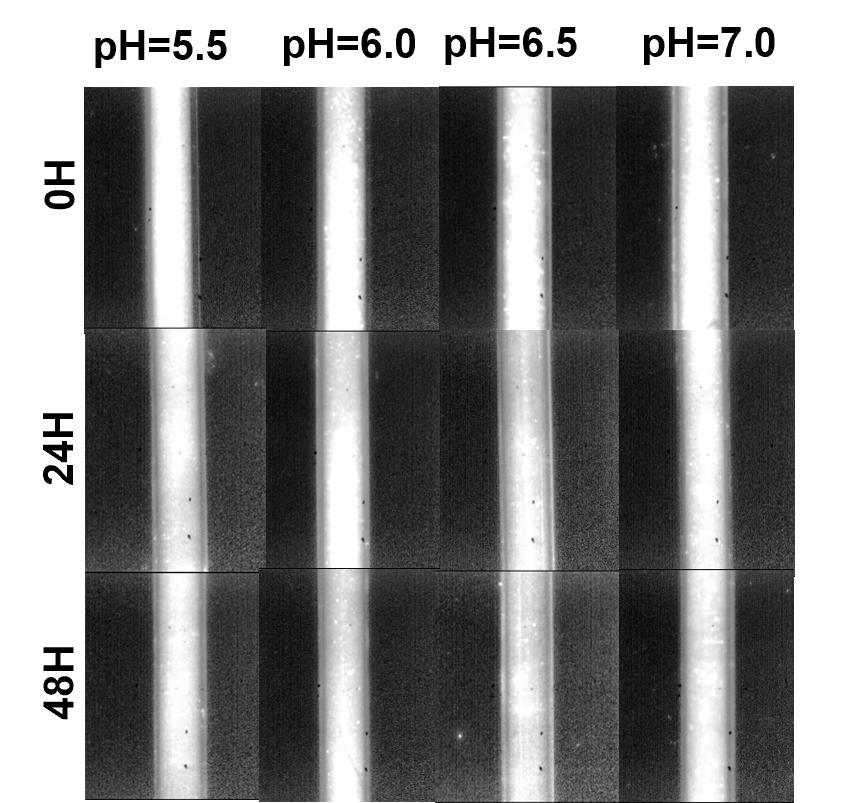


**Figure 3S** Fluorescence stability of RBC@ICG-DOX NPs at 0, 24 and 48 h in different pH.


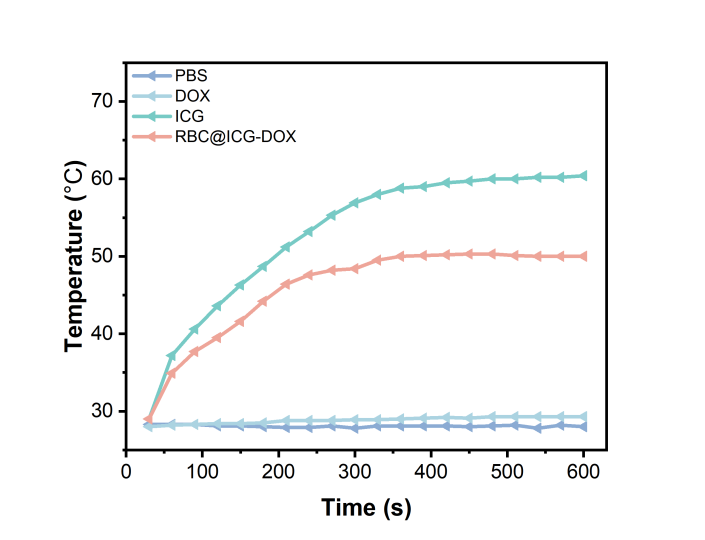


**Figure 4S** Temperature rise versus time profiles of PBS, free DOX, freeICG, and RBC@ICG-DOX NPs irradiated by an 808 nm laser (0.5 W cm-2).


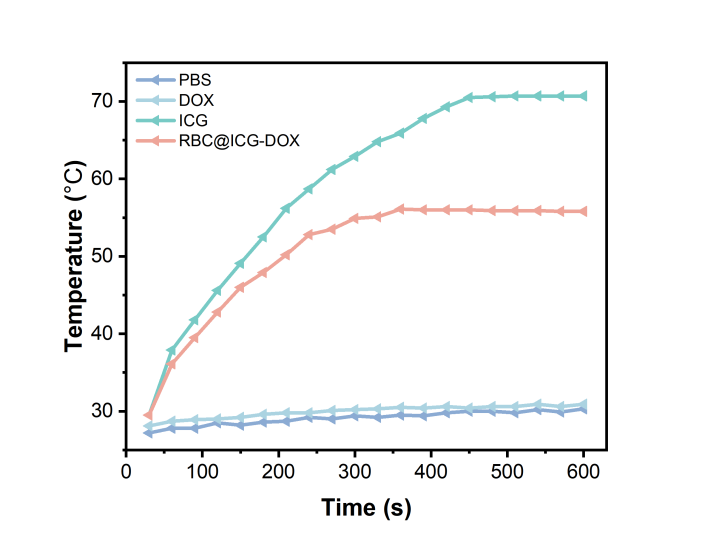


**Figure 5S** Temperature rise versus time profiles of PBS, free DOX, freeICG, and RBC@ICG-DOX NPs irradiated by an 808 nm laser (1 W cm-2).

**Figure 6S** Photothermal conversion efficiency of RBC@ICG-DOX.

**Figure 7S** Cell viability analysis of HeLa cells incubated in the dark and with laser irradiation (808 nm，1 W cm -2).


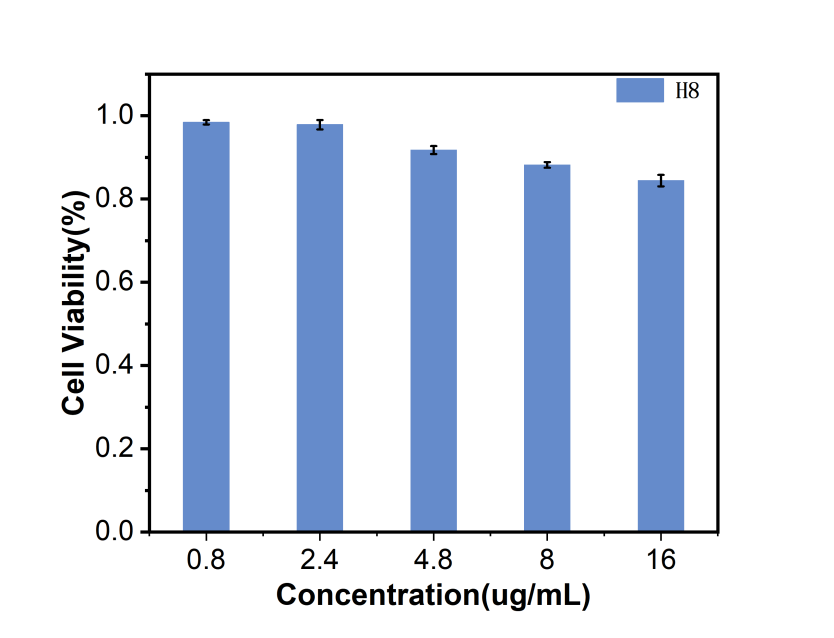


**Figure 8S** The cellular viability of H8 cells treated with RBC@ICG-DOX NPs.
